# Supplementary material for: Validation of initial observation from the first space-borne high spectral resolution lidar with ground-based lidar network
Source: Copernicus journal article supplement (doi:10.5194/amt-2023-235), 2023-11-13
Supplement: Supplementary file [file amt-2023-235-AC2-supplement.pdf]

## **Response to the comments of Reviewers**

### **RC2: 'Comment on amt-2023-235', Anonymous Referee #2**

The article introduces China's first successful launch of the world's first space hyperspectral resolution laser mine (ACDL), and analyzes the observation results of six cases including sunny, dust storm, and cloudy weather with ground-based LiDAR and CALIPSO, verifying that the radar can accurately detect the three-dimensional distribution of aerosols and clouds worldwide. However, the introduction and results analysis were not well described, resulting in redundant components and analysis deficiencies.

**Response:** We would like to thank the reviewer for providing constructive suggestions and comments. We have addressed each of the reviewer's comments and it has improved the quality and clarity of the manuscript.

Specific comments:

1. In the second and third paragraphs of the introduction, the author provides a large number of examples to prove the argument that satellite based LiDAR data must be appropriately validated by ground-based LiDAR. In my opinion, this is too redundant. Two typical examples are sufficient.

**Response:** Thanks for your suggestion. Indeed, the introduction section provides too much description of the satellite validation work. Based on the suggestions of the referee, we have streamlined the content of the introduction.

2. In Figures 5 and 8, the TABC results of ACDL generally show a left shift phenomenon compared to the results of ground-based LiDAR, and the fluctuation of ACDL is significantly larger. Can the author explain this phenomenon?

**Response:** We thank you for raising the question. The discrepancies in the comparison of aerosol and cloud between ACDL and ground-based lidar measurement are possible because of the several factors such as different lidar system parameters, the difference in detection distance between spaceborne and ground-based systems, various

aerosols and clouds distribution, the inhomogeneity of the atmosphere and also can be due to the uneven terrain in the northwest region of China (Figure R1). Furthermore, even though the measurements are simultaneous, if the observation points are not at the same location, it can lead to discrepant comparison results (Chiang et al., 2011). Due to the closer observation positions of the two clear cases in Figure 5, the observation difference between Figure 5 is smaller than that in Figure 8 (the closest distance in Figure 5 are 7 km and 0.2 km, respectively; the closest distance in Figure 8 are 17.3 km and 28.6 km, respectively).

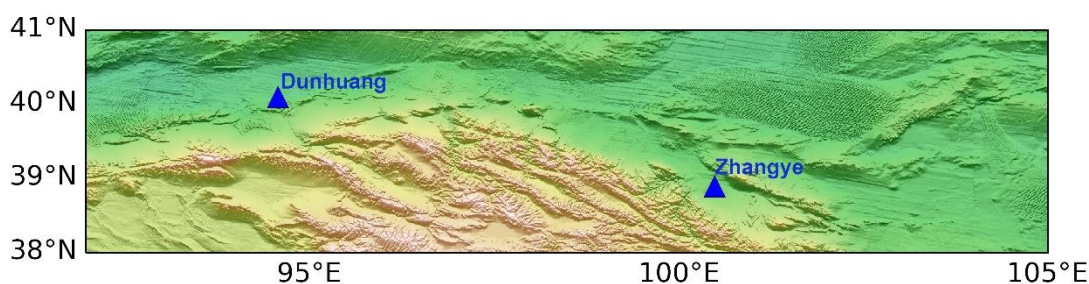

**Figure R1.** Topographic characteristics of the location of ground-based lidar.

The random noise in the ACDL profiles is higher than the ground-based lidar profiles due to their much longer measurement range and shorter integration times, and the daytime noise level is higher than nighttime due to the statistical fluctuations associated with solar background light. Reducing the noise to the required level requires averaging profiles along the ground track (Gimmestad et al., 2017). However, spatial aerosol inhomogeneities introduce systematic error into the averages. The Zhangye and Dunhuang lidar station are located at 1454 m a.s.l. and 1142 m a.s.l., respectively, with a complex topography of the surrounding area (Figure R1) that makes very difficult the comparison in the planetary boundary layer with satellite data acquired with imperfect spatial coincidence. Overall, the observation comparison results between the ACDL and ground-based lidar are acceptable.

In the end of Section 3, we added “*The discrepancies in the comparison between ACDL and ground-based lidar measurement are possible because of the several factors such as different lidar system parameters, the difference in detection distance between spaceborne and ground-based systems and also can be due to the*

*inhomogeneity of the atmosphere (Chiang et al., 2011; Belegante et al., 2018). Overall, the observation comparison results between the ACDL and ground-based lidar are acceptable.”*

Reference:

Chiang, C.-W., Kumar Das, S., Shih, Y.-F., Liao, H.-S., and Nee, J.-B.: Comparison of CALIPSO and ground-based lidar profiles over Chung-Li, Taiwan, *Journal of Quantitative Spectroscopy and Radiative Transfer*, 112, 197–203, <https://doi.org/10.1016/j.jqsrt.2010.05.002>, 2011.

Gimmestad, G., Forrister, H., Grigas, T., and O’Dowd, C.: Comparisons of aerosol backscatter using satellite and ground lidars: implications for calibrating and validating spaceborne lidar, *Sci Rep*, 7, 42337, <https://doi.org/10.1038/srep42337>, 2017.

3. What is the specific standard deviation represented by the shadow envelope in Figures 5, 8, and 12? If it is the standard deviation of the black solid line and the green solid line in the figure, then it should be a value. If not, please provide specific explanations.

**Response:** We thank you for raising the question. The black and green shadows in the Figures 5, 8, and 12 represent the standard deviation of ACDL and ground-based lidar observations, respectively. The calculation formula is:

$$\sigma = \sqrt{\frac{1}{N} \sum_{i=1}^N (X_i - \mu)^2} \quad (1)$$

Where  $\sigma$  is the standard deviation,  $N$  is the number of selected profiles. For a certain observation height,  $\mu$  is the average value of different profiles,  $X_i$  is the corresponding observation value. For ACDL, we select the point nearest to the ground-based lidar position in the ground track and took 10 profiles before and after it for average (black solid line in the figures) and standard deviation (black shadow in the figures) calculation,  $N=21$ ; For ground-based lidar, we select 10 minutes of observations before and after the ACDL overpass time to calculate the average (green solid line in the figures) and standard deviation (green shadow in the figures),  $N=5$ .

Indeed, observations corresponding to a height are able to obtain a mean and a standard deviation, and we denote the random noise of the two observations in the form of “mean  $\pm$  standard deviation”, respectively. The random noise (the range of shadows) in the ACDL profiles is much higher than the ground-based lidar profiles due to their much longer measurement range and shorter integration times, and the daytime noise level is higher than nighttime due to the statistical fluctuations associated with solar background light.

4. In Figure 9, there is a significant difference in VDR values between ACDL and CALIPSO at several altitudes (such as below 2.5km). Why does the author still believe in the last paragraph of Section 3.2 that the observation results of ACDL and CALIPSO have good consistency?

**Response:** Thanks for the comment. At low altitudes, the difference of observations is probably due to the distance between the location of ground-based lidar and the ACDL ground track. For this comparison, the nearest distance between the CALIPSO ground track and the ACDL ground track was 69 km (Figure R2). Due to spatiotemporal variations in humidity and aerosols in the lower atmosphere, as well as non-uniformity in the atmosphere near the surface, these observational differences occur near the planetary boundary layer (Kim et al., 2008; Mamouri et al., 2009; Chiang et al., 2011).

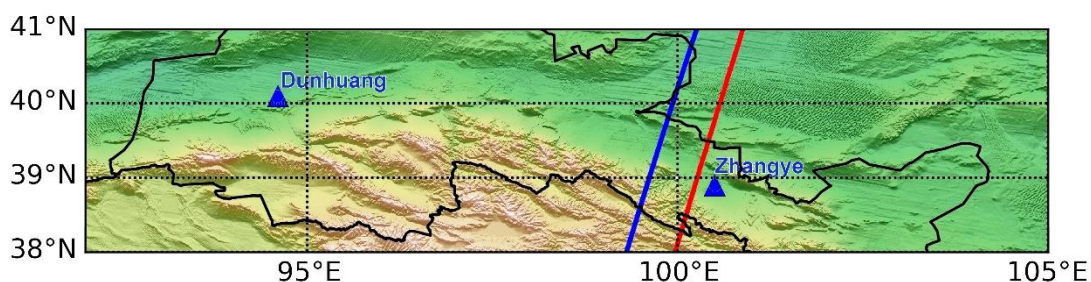

**Figure R2.** Topographic characteristics of the location of ground-based lidar (the solid red line represents the ACDL ground track, while the solid blue line represents the CALIPSO ground track).

In addition, the uneven terrain in the northwest region of China can also affect

satellite observations (Figure R2), resulting in significant differences in the comparison between ACDL and CALIPSO near the surface. The Zhangye lidar station is located at 1454 m a.s.l. with a complex topography of the surrounding area that makes very difficult the comparison in the planetary boundary layer with satellite data acquired with imperfect spatial coincidence. Validation of CALIPSO using ground-based lidar has also found observational differences near the surface (Figure R3). However, the main layering characteristics are evident also in the CALIPSO and ACDL profiles, which are similar to those observed by the ground-based lidar.

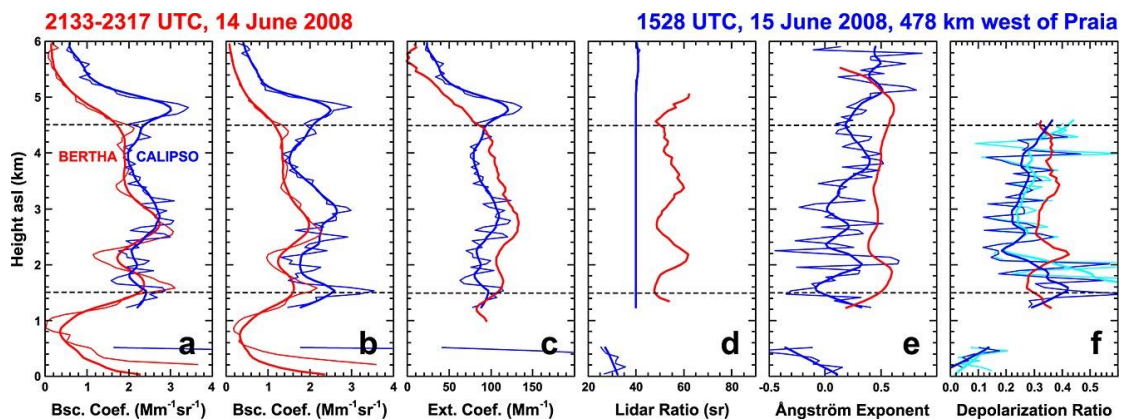

**Figure R3.** Height profiles of the backscatter coefficients at (a) 532 and (b) 1064 nm, the (c) extinction coefficient and (e) lidar ratio at 532 nm, the (e) backscatter-related Ångström exponent for the wavelength pair 532/1064 nm, and the (f) particle depolarization ratio at 532 nm as measured with BERTHA (red) between 2133 and 2317 UTC on 14 June 2008 and CALIPSO (blue) during an overpass at 1528 UTC on 15 June 2008 about 478 km to the west of Praia, Cape Verde (see Table 3). Thin and thick lines denote unsmoothed and smoothed (660 m) profiles, respectively. Particle depolarization ratio profiles measured with BERTHA are compared to the ones given in the CALIPSO level 2 files (light blue in f) and calculated according to equation (2) (dark blue in Figure 3f). The dotted lines mark the vertical range used for a comparison of the measurements of the two instruments (see column 7 in Table 3) (From Figure 3 of Tesche et al., 2013).

Reference:

- Chiang, C.-W., Kumar Das, S., Shih, Y.-F., Liao, H.-S., and Nee, J.-B.: Comparison of CALIPSO and ground-based lidar profiles over Chung-Li, Taiwan, *Journal of Quantitative Spectroscopy and Radiative Transfer*, 112, 197–203, <https://doi.org/10.1016/j.jqsrt.2010.05.002>, 2011.
- Kim, S.-W., Berthier, S., Raut, J.-C., Chazette, P., Dulac, F., and Yoon, S.-C.: Validation of aerosol and cloud layer structures from the space-borne lidar CALIOP using a ground-based lidar in Seoul, Korea, *Atmos. Chem. Phys.*, 8, 3705–3720, <https://doi.org/10.5194/acp-8-3705-2008>, 2008.
- Mamouri, R.-E., Amiridis, V., Papayannis, A., Giannakaki, E., Tsaknakis, G., and Balis, D.: Validation of CALIPSO space-borne-derived attenuated backscatter coefficient profiles using a ground-based lidar in Athens, Greece, *Atmospheric Measurement Techniques*, 2, <https://doi.org/10.5194/amt-2-513-2009>, 2009.
- Tesche, M., Wandinger, U., Ansmann, A., Althausen, D., Müller, D., and Omar, A. H.: Ground-based validation of CALIPSO observations of dust and smoke in the Cape Verde region, *JGR Atmospheres*, 118, 2889–2902, <https://doi.org/10.1002/jgrd.50248>, 2013.

5. The focus of the paper is to verify the consistency between ACDL and ground-based LiDAR observations, however, the presence of CALIPSO in the abstract and introduction is too strong, which is unnecessary. Although it would be more convincing to verify the consistency between ACDL and CALIPSO, as shown in Figure 9, their consistency is not very ideal.

**Response:** Thanks for your suggestion. At the beginning of the validation, we only used ground-based lidar. When we attempted to submit to the ACP journal, the editor suggested that we consider comparing ACDL with CALIPSO and we followed the editor's suggestion. In our manuscript, our focus is on using ground-based lidar to validate ACDL, and CALIPSO observations are only an auxiliary.

There are differences between ACDL and CALIPSO in comparison, which may be due to differences in satellite parameters (for CALIPSO: field of view (FOV) is 0.13 mrad, the pulse energy is 110 mJ; for ACDL: FOV is 0.2 mrad, the pulse energy is 150

mJ); distance difference between ground tracks. At low altitudes, the difference of observations is probably due to the distance between the location of ground-based lidar and the ACDL ground track. For this comparison, the nearest distance between the CALIPSO ground track and the ACDL ground track was 69 km (Figure R2). Due to spatiotemporal variations in humidity and aerosols in the lower atmosphere, as well as non-uniformity in the atmosphere near the surface, these observational differences occur near the planetary boundary layer (Kim et al., 2008; Mamouri et al., 2009; Chiang et al., 2011). In addition, the uneven terrain in the northwest region of China (Figure R1) can also affect satellite observations, resulting in significant differences in the comparison between ACDL and CALIPSO near the surface. The Zhangye lidar station is located at 1454 m a.s.l. with a complex topography of the surrounding area that makes very difficult the comparison in the planetary boundary layer with satellite data acquired with imperfect spatial coincidence. Similar comparative differences have also been observed in previous studies (Figure R4). However, the main layering characteristics are evident also in the CALIPSO and ACDL profiles, which are similar to those observed by the ground-based lidar.

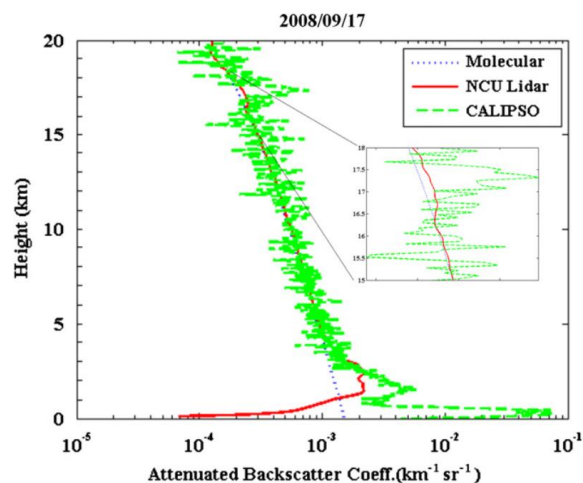

**Figure R4.** The comparison on vertical profiles of attenuated backscatter measured by CALIPSO (green dash line) and ground-based lidar (red solid line) system on 17 September 2008. Blue dot line is the molecular attenuated backscatter. (For interpretation of the references to colour in this figure legend, the reader is referred to the web version of this article.) (From Figure 2 of Chiang et al., 2011).

Reference:

- Chiang, C.-W., Kumar Das, S., Shih, Y.-F., Liao, H.-S., and Nee, J.-B.: Comparison of CALIPSO and ground-based lidar profiles over Chung-Li, Taiwan, *Journal of Quantitative Spectroscopy and Radiative Transfer*, 112, 197–203, <https://doi.org/10.1016/j.jqsrt.2010.05.002>, 2011.
- Kim, S.-W., Berthier, S., Raut, J.-C., Chazette, P., Dulac, F., and Yoon, S.-C.: Validation of aerosol and cloud layer structures from the space-borne lidar CALIOP using a ground-based lidar in Seoul, Korea, *Atmos. Chem. Phys.*, 8, 3705–3720, <https://doi.org/10.5194/acp-8-3705-2008>, 2008.
- Mamouri, R.-E., Amiridis, V., Papayannis, A., Giannakaki, E., Tsaknakis, G., and Balis, D.: Validation of CALIPSO space-borne-derived attenuated backscatter coefficient profiles using a ground-based lidar in Athens, Greece, *Atmospheric Measurement Techniques*, 2, <https://doi.org/10.5194/amt-2-513-2009>, 2009.

6. Similar to the fourth opinion, the difference in observation results between ACDL and ground-based LiDAR in Figure 12 is so significant. Why does the author still believe in the third paragraph of Section 3.3 that both TABC and VDR values are numerically close?

**Response:** Thanks for your suggestion. Figure 12 is a comparison of observations for two cloud cases. Clouds are more complex than aerosols because of their geometrical and optical properties. Especially for spaceborne lidars, the multiple scattering in clouds is not negligible (Winker, 2003). It is well known that spaceborne lidar measurements of ice clouds are typically affected by specular reflection, when observed by lidar pointed near the nadir (Young and Vaughan, 2009). Specular reflection causes anomalously high backscatter (Hogan and Illingworth, 2003). Therefore, many studies have shown that there are differences in spaceborne and ground-based lidar observations when clouds are present (Kim et al., 2008; Mona et al., 2009; Chiang et al., 2011). However, as clouds are a very important atmospheric process, evaluating the recognition ability of newly launched satellites for clouds is equally important. For the most cloud cases, the heights of clouds are different from



several meters to several hundred meters between spaceborne and ground-based lidar measurements (Figure R5). It is due to the various distributions of clouds and the observations are not being made exactly at the same place. Comparison results of clouds illustrate the limitations of spaceborne downward-looking and ground-based upward-looking lidar measurements due to strong signal attenuations, and imply that only information on the cloud top (bottom) height is reliable from satellite-based ACDL (ground-based lidar) observations. However, the complementarity between space-borne and ground-based lidar observations can provide complete vertical structures of aerosols and clouds.

We added “*Due to the inhomogeneous horizontal distribution of aerosols in the lower troposphere and clouds, there are some differences between cloud and boundary layer lidar measurements.*” in Section 4. And we changed sentence “However, numerically both TABC and VDR values are closer” to “*However, both observations show similar cloud structures.*” in Section 3.3.

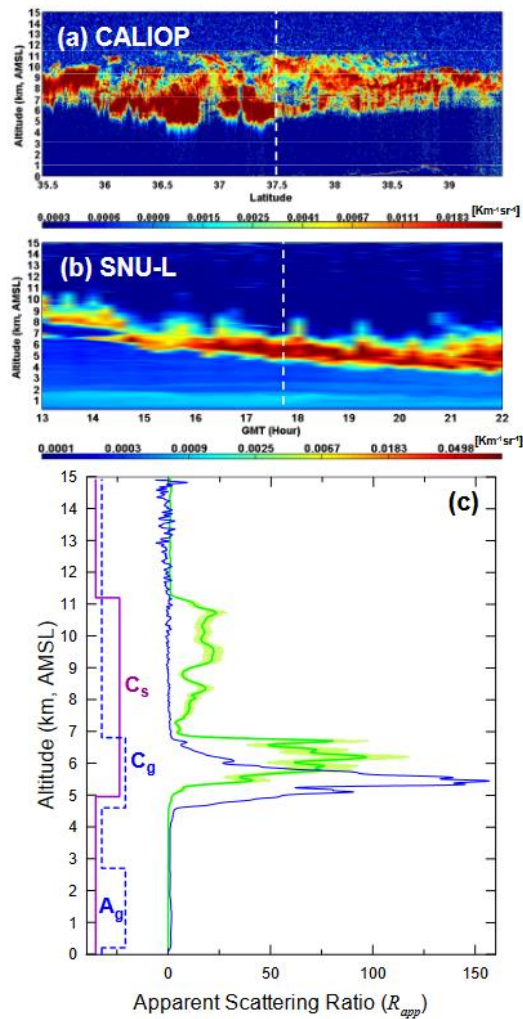

**Figure R5.** Vertical profiles of (a) CALIOP-derived and (b) SNU lidar-derived total attenuated backscatter at 532 nm wavelength, and (c) apparent scattering ratios  $R_{app}$  at 532 nm calculated from the CALIOP (green lines) and the SNU lidar (blue line) measurements on 14 September 2006 (17:41 UTC) (From Figure 6 of Kim et al., 2008).

Reference:

- Chiang, C.-W., Kumar Das, S., Shih, Y.-F., Liao, H.-S., and Nee, J.-B.: Comparison of CALIPSO and ground-based lidar profiles over Chung-Li, Taiwan, *Journal of Quantitative Spectroscopy and Radiative Transfer*, 112, 197–203, <https://doi.org/10.1016/j.jqsrt.2010.05.002>, 2011.
- Hogan, R. J. and Illingworth, A. J.: The effect of specular reflection on spaceborne lidar measurements of ice clouds, Report of the ESA Retrieval algorithm for

EarthCARE project, 2003.

Kim, S.-W., Berthier, S., Raut, J.-C., Chazette, P., Dulac, F., and Yoon, S.-C.: Validation of aerosol and cloud layer structures from the space-borne lidar CALIOP using a ground-based lidar in Seoul, Korea, *Atmos. Chem. Phys.*, 8, 3705–3720, <https://doi.org/10.5194/acp-8-3705-2008>, 2008.

Mona, L., Pappalardo, G., Amodeo, A., D'Amico, G., Madonna, F., Boselli, A., Giunta, A., Russo, F., and Cuomo, V.: One year of CNR-IMAA multi-wavelength Raman lidar measurements in coincidence with CALIPSO overpasses: Level 1 products comparison, *Atmos. Chem. Phys.*, 9, 7213–7228, <https://doi.org/10.5194/acp-9-7213-2009>, 2009.

Winker, D.: Accounting for multiple scattering in retrievals from space lidar, *Proc. SPIE Int. Soc. Opt. Eng.*, 5059, 128–139, 2003.

Young, S. A. and Vaughan, M. A.: The Retrieval of Profiles of Particulate Extinction from Cloud-Aerosol Lidar Infrared Pathfinder Satellite Observations (CALIPSO) Data: Algorithm Description. *J. Atmos. Oceanic Technol.*, 26(6), 1105–1119, 2009.
